# Supplementary material
Source: Elsevier journal article supplement (https://www.sciencedirect.com/science/article/pii/S0212656719302252)
Supplement: mmc1 [file S0212656719302252:mmc1.docx]

**Anexo 1.-** **Versión final de la encuesta sobre conocimientos en lactancia para enfermeras (ECoLaE).**

**CUESTIONARIO LACTANCIA MATERNA**

Se trata de un cuestionario anónimo para evaluar la formación en lactancia. NO ES UN EXAMEN.
Por favor, contesta sin consultar las respuestas.

GRACIAS POR TU PARTICIPACIÓN

Consta de unas 30 preguntas de distintos formatos.
Su duración aproximada es de unos 10-15 minutos. No se puede guardar para contestarlo en diferentes momentos, así que comprueba que dispones del tiempo necesario antes de empezar.

**Código de identificación. Por favor, introduce los 3 últimos números de tu DNI (ej: 789). Nos sirve para identificar de forma anónima la encuesta.**

Tu respuesta

DATOS DEMOGRAFICOS

**Edad**

Tu respuesta

**Sexo**

- Mujer
- Hombre

**Número de hijos**

- Ninguno
- 1
- 2
- 3 o más

**Experiencia personal de lactancia (o de pareja) ***

- si
- no

**Duración global de la lactancia (meses)**

Tu respuesta

**Categoría profesional**

- Enfermera
- Enfermera especialista en enfermería obstétrico-ginecológica (matrona)
- Enfermera especialista en pediatría
- Enfermera especialista en enfermeria familiar y comunitaria

**Lugar de trabajo**

- Atención primaria
- Urgencias pediátricas
- Neonatología
- Área de partos
- Hospitalización obstetricia
- Hospitalización pediatría

CUESTIONARIO SOBRE FORMACIÓN EN LACTANCIA MATERNA

1. **En caso de mastitis se debe suspender la lactancia de forma temporal ***

- Verdadero
- Falso

**2. Se debe recomendar que las tomas sean de 15 minutos en cada pecho cada 2-3 horas.**

- Falso
- Verdadero

**3. La alimentación exclusiva a base de leche de fórmula conlleva un riesgo incrementado de morbimortalidad.**

- Verdadero
- Falso

**4. La mayoría de bebés nacidos por cesárea necesitan suplementación con fórmula las primeras horas de vida.**

- Falso
- Verdadero

**5. En el caso de que un lactante amamantado tenga problemas con la lactancia y precise un suplemento (de leche materna o artificial), se desaconseja por regla general administrarlo con biberón, especialmente en las primeras semanas de vida.**

- Falso
- Verdadero

**6. En un recién nacido amamantado: una frecuencia elevada de tomas disminuye el riesgo de precisar fototerapia.**

- Falso
- Verdadero

**7. En un recién nacido sano, antes de la primera toma de pecho en paritorio se le debe pesar, comprobar el test de Apgar en una cuna con calor radiante y realizar una correcta profilaxis oculohemorrágica.**

- Falso
- Verdadero

**8. En grandes prematuros (<32 sem) es de elección la leche materna (fortificada cuando lo precise), siendo la segunda mejor opción la leche humana de banco; y dejando la suplementación con fórmula especial para prematuros sólo como última alternativa.**

- Verdadero
- Falso

**9. En la Maternidad, un recién nacido de más de 15 horas de vida al que hay que despertar para mamar en todas las tomas es un lactante de riesgo.**

- Falso
- Verdadero

**10. A partir de los 12 meses el contenido en nutrientes de la leche materna disminuye significativamente con respecto al primer año de lactancia.**

- Falso
- Verdadero

**11. Si un niño amamantado, con buen estado general, presenta como único hallazgo una escasa ganancia de peso, el primer paso es suplementar las tomas con leche de fórmula y revalorar.**

- Verdadero
- Falso

**12. A partir de los 6 meses, las tomas deben reducirse a 2-3 al día, complementadas con el resto de alimentos.**

- Verdadero
- Falso

**13. La “leche aguada” es en realidad la leche de la primera parte de la toma.**

- Falso
- Verdadero

**14. El siguiente dibujo muestra cómo debería ser un enganche eficaz**

- Falso
- Verdadero


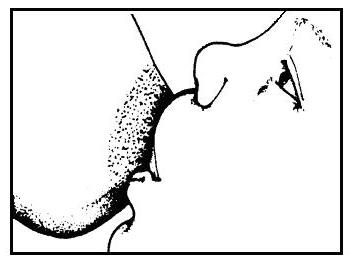


**15.¿Cuáles son las recomendaciones actuales de la OMS sobre lactancia? ***

- Lactancia materna exclusiva (LME) hasta los 4 meses de edad, complementada con otros alimentos hasta que deseen madre e hijo
- LME hasta los 6 meses de edad, pudiendo mantener la lactancia, complementada con otros alimentos, hasta un máximo de 2 años.
- LME hasta los 6 meses y posteriormente complementada con otros alimentos hasta los 2 años o más, según deseen madre e hijo.

**16. ¿Cuál de las siguientes actuaciones es la más importante a realizar en una madre lactante que tiene grietas en los pezones?**

- Valoración de la toma.
- Recomendar el uso de pezoneras.
- Aplicación de lanolina pura después de cada toma
- Lavado con agua y jabón.

**17. Unos padres traen a su bebé de 17 días a la urgencia por llanto. Sólo toma pecho y hasta ahora todo iba bien, pero refieren que desde hace 24 horas llora y pide pecho muy a menudo, a veces cada 30-60 minutos. En el pecho se calma y succiona vigorosamente. El niño no tiene apariencia de enfermedad, la ganancia ponderal es buena y la exploración es normal, pero la madre tiene la sensación de que se queda con hambre. ¿Qué te sugiere y cómo lo abordarías? ***

- Brote de crecimiento. Observaría la toma, recomendaría tomas a demanda y controles habituales por su pediatra.
- Cólicos del lactante. Recomendaría masajes abdominales y balancear al niño en decúbito prono hasta que le toque la siguiente toma.
- Hipogalactia. Suplementaría las tomas con 60 ml de fórmula y control con su pediatra.
- Hipogalactia. Recomendaría pesar antes y después de la toma y suplementar con fórmula para completar en cada toma la cantidad necesaria para 150 ml/kg/día repartidos en 8 tomas.

**18. Enumera 5 características de un enganche eficaz que podrías utilizar para evaluar una toma:**

***No se darán por válidas respuestas amplias o ambiguas (ej. labios o postura labios), se pide ser concreto aunque en 2 o 3 palabras. Si no puedes rellenar todas, pon un 0 ("cero")**

Tu respuesta

Tu respuesta

Tu respuesta

Tu respuesta

Tu respuesta

**19.¿Qué le dirías a una mujer embarazada que te comenta en la consulta que se está planteando la lactancia artificial?**

- Nada, puesto que se trata de una opción personal y la respetaría.
- Le pediría que me hablara más sobre el tema para conocer sus razones e información y desde el respeto valoraría animarle a replantearlo.
- Que dada la absoluta superioridad de la leche materna, es una irresponsabilidad no amamantar cuando no hay contraindicaciones.
- Que no se sienta culpable, porque la mayoría de niños se crían igual de bien con pecho que con biberón.
- Todas las anteriores son correctas.

**20.Acerca de que se proporcionen muestras gratuitas de leche de inicio a las madres, en centros sanitarios:**

- Es una violación del Código Internacional de Comercialización de Sucedáneos de la Leche Materna.
- Es aceptable como apoyo parcial si la familia es de bajos recursos
- Es aceptable si ponen claramente que la leche materna es el mejor alimento para el lactante.
- Es adecuado para ayudar a madres con dificultades en su lactancia.
- Todas las anteriores son correctas.

**21. Una madre lactante consulta porque va a comenzar tratamiento con adalimumab por una enfermedad de Crohn. Su digestólogo le ha dicho que debe destetar a su bebé de 8 meses porque el tratamiento es muy importante. ¿Dónde podrías consultar si el fármaco es compatible o no con la lactancia?**

- En la ficha técnica del medicamento.
- En el Medimecum.
- Me remitiría a la información del médico especialista que lo haya prescrito.
- En una página web que conozco (especificar cuál):
- No es necesario consultarlo. Valorando riesgos y beneficios lo más adecuado es el destete, puesto que el niño tiene ya 8 meses.

**22.Eres la enfermera y estás en la Maternidad. Una auxiliar está preocupada por la lactancia de un recién nacido, cree que algo no va bien y quiere que vayas a observar una toma**

- He observado tomas numerosas veces y me vería capaz de identificar y ofrecer soluciones a los problemas más habituales.
- Creo que nunca lo he hecho y no sabría exactamente qué observar.
- No me siento seguro. Me fijaría más en cuánto peso ha perdido y en la glucemia. En caso de duda, recomendaría un suplemento para evitar la pérdida de peso.
- He observado alguna toma, pero no tengo mucha experiencia. Creo que identificaría solamente problemas muy evidentes.

**23.¿Consideras apropiado que una mujer dé de mamar en público? ***

- No
- Si

**24.Valora la calidad de la formación recibida sobre lactancia materna durante los últimos años de formación**

| Muy deficiente | **1** | **2** | **3** | **4** | **5** | Muy satisfactoria |
| --- | --- | --- | --- | --- | --- | --- |

**25.¿Has recibido algún curso específico de lactancia materna durante los años de formación?**

- Si
- No

**26.En caso afirmativo, indica el número de cursos recibido:(respuesta numérica)**

Tu respuesta

**27.Duración total aproximada, en horas:(respuesta numérica)**

Tu respuesta

**28.¿Cual es tu mayor fuente de conocimiento en lactancia materna?**

**(puedes marcar varias opciones)**

- Cursos
- Libros / artículos
- Conocimientos del pregrado
- Mis residentes mayores (o adjuntos)
- Otros compañeros de trabajo
- Mi experiencia personal
- Otro:

**29.¿Crees que deberías ser un experto en identificar y aportar soluciones a los problemas específicos de la lactancia?**

- Si
- No

**30.¿Por qué?**

- Porque es un motivo de consulta frecuente
- Por el bien de mis pacientes y sus familias
- Porque es parte de mi trabajo
- Porque NO es parte de mi trabajo

**31.¿Te sientes preparado para ello?**

| No, en absoluto | **1** | **2** | **3** | **4** | **5** | Si, totalmente |
| --- | --- | --- | --- | --- | --- | --- |
